# Supplementary material for: Associations Between Features of Glucose Exposure and A1C: The A1C-Derived Average Glucose (ADAG) Study
Source: PubMed Central journal article supplement — Diabetes. 2010 Apr 27;59(7):1585–90. doi: 10.2337/db09-1774 (PMC2889756; doi:10.2337/db09-1774), 2010-04-27

**Supplemental Table. Area Under the Curve above selected plasma glucose concentrations (per 24-h monitoring period).**

|                          | <b>Type 1 DM</b>      |                 | <b>Type 2</b>          |                 | <b>Type 2</b>         |                 | <b>Non-DM</b>         |                 |
|--------------------------|-----------------------|-----------------|------------------------|-----------------|-----------------------|-----------------|-----------------------|-----------------|
|                          |                       |                 | <b>Insulin treated</b> |                 | <b>No Insulin</b>     |                 |                       |                 |
|                          | <b>(n=270)</b>        |                 | <b>(n=60)</b>          |                 | <b>(n=99)</b>         |                 | <b>(n=80)</b>         |                 |
| <b>Glucose Threshold</b> | <b>Proportion</b>     |                 | <b>Proportion</b>      |                 | <b>Proportion</b>     |                 | <b>Proportion</b>     |                 |
| <b>mmol/l (mg/dL)</b>    | <b>reaching level</b> | <b>AUC (SD)</b> | <b>reaching level</b>  | <b>AUC (SD)</b> | <b>reaching level</b> | <b>AUC (SD)</b> | <b>reaching level</b> | <b>AUC (SD)</b> |
| <b>7.0 (126)</b>         | 100%                  | 69.7(42.9)      | 100%                   | 60.7(36.8)      | 100%                  | 36.3(43.3)      | 99%                   | 2.2 (3.6)       |
| <b>11.1 (200)</b>        | 98%                   | 26.3(25.7)      | 100%                   | 17.5(18.3)      | 88%                   | 9.7 (25.5)      | 9%                    | 1.3 (2.2)       |
| <b>16.7 (300)</b>        | 82%                   | 5.5 (8.5)       | 63%                    | 2.6 (4.3)       | 31%                   | 4.4 (13.1)      | 1%                    | 1.1 (0)         |

**AUC: Area under the curve in mmol/l · hour. Means and (SD).**

**Figure 1.** Pairwise scatter diagrams illustrating selected Correlations of Glycemic Variables with Pearson correlation coefficients (r) for each pair of indices (not including non-DM data), highlighting the different participant subgroups with different colours (T1DM: red; T2DM: blue; non-DM: black).

As illustrated in the grey zone, the variability measures did not correlate well with the postprandial measurements or indices of fasting or average glycaemia.

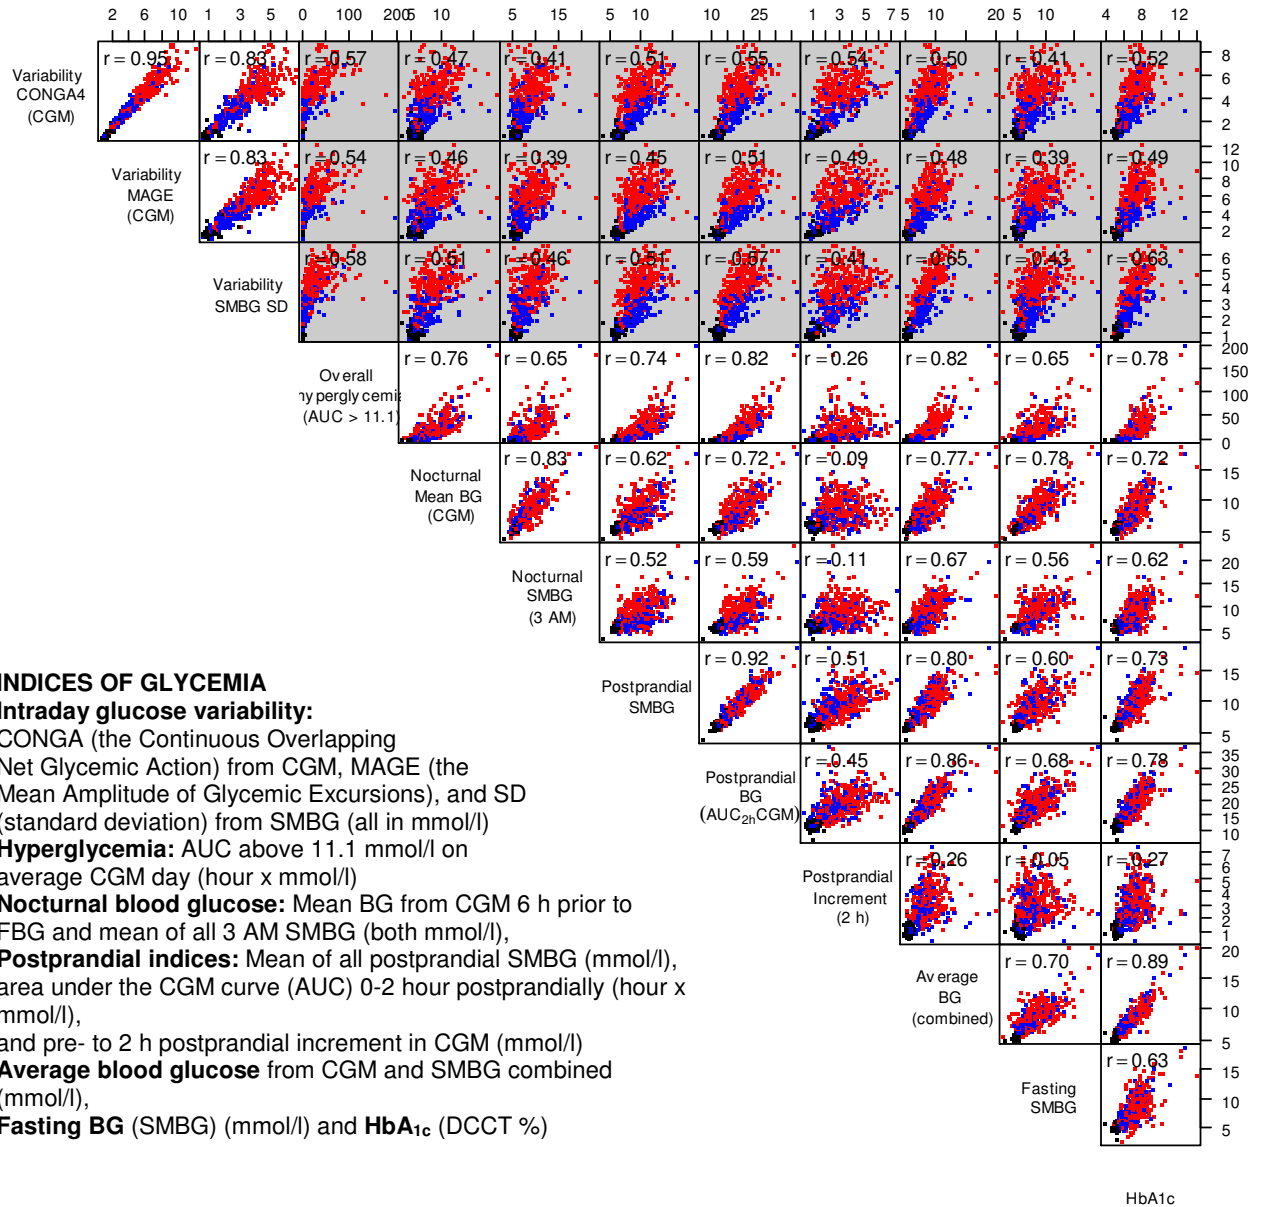

Supplement: supp_db09-1774_db091774onlineappendix.pdf [file supp_db09-1774_db091774onlineappendix.pdf]
